# Supplementary material for: Effect of CAR activation on selected metabolic pathways in normal and hyperlipidemic mouse livers
Source: PubMed Central journal article supplement (PMC2739862; doi:10.1186/1471-2164-10-384), 2009-08-19
Supplement: 1471-2164-10-384-S1.pdf [file 1471-2164-10-384-S1.pdf]

### Differentially expressed genes in mouse liver after TCPOBOP treatment

Differentially expressed genes in mouse liver after TCPOBOP treatment or cholesterol diet as detected by the Steroltalk microarray. Data represent  $\log_2$  ratios of TCPOBOP treated versus vehicle treated on the same diet (standard or cholesterol) and vehicle treated group on cholesterol diet versus standard diet. Six animals per group were used and p-value was calculated using t-test as implemented in BRB-Array Tools. nc – no change.

| Gene Symbol                     | GenBank Accession | Gene Description                                               | TCPOBOP                |         | TCPOBOP + cholesterol diet |         | Cholesterol diet       |         |
|---------------------------------|-------------------|----------------------------------------------------------------|------------------------|---------|----------------------------|---------|------------------------|---------|
|                                 |                   |                                                                | Log <sub>2</sub> ratio | p-value | Log <sub>2</sub> ratio     | p-value | Log <sub>2</sub> ratio | p-value |
| <b>Cholesterol biosynthesis</b> |                   |                                                                |                        |         |                            |         |                        |         |
| Sc4mol                          | NM_025436         | Sterol-C4-methyl oxidase-like                                  | nc                     | nc      | 1.85                       | 0.001   | -2.50                  | 0.000   |
| Cyp51                           | BC031813          | Cytochrome P450, family 51                                     | nc                     | nc      | 1.27                       | 0.008   | -1.86                  | 0.001   |
| Hmgcs1                          | NM_145942         | 3-hydroxy-3-methylglutaryl-Coenzyme A synthase 1               | nc                     | nc      | 1.20                       | 0.015   | -1.79                  | 0.001   |
| Fdps                            | NM_134469         | Farnesyl diphosphate synthase 1                                | nc                     | nc      | 0.99                       | 0.026   | -1.73                  | 0.001   |
| Fdft1                           | NM_010191         | Farnesyl diphosphate farnesyl transferase 1, Squalene synthase | nc                     | nc      | 1.08                       | 0.006   | -1.69                  | 0.000   |
| Nsdhl                           | BC019945          | NAD(P) dependent steroid dehydrogenase-like                    | nc                     | nc      | 0.99                       | 0.033   | -1.35                  | 0.004   |
| Lss                             | NM_146006         | Lanosterol synthase                                            | 0.60                   | 0.033   | 0.81                       | 0.012   | -1.31                  | 0.000   |
| Mvd                             | NM_138656         | Mevalonate (diphospho) decarboxylase                           | nc                     | nc      | 0.88                       | 0.017   | -1.27                  | 0.002   |
| Mvk                             | NM_023556         | Mevalonate kinase                                              | nc                     | nc      | 0.86                       | 0.010   | -1.18                  | 0.001   |
| Hmgcr                           | NM_008255         | 3-hydroxy-3-methylglutaryl-Coenzyme A reductase                | 0.99                   | 0.001   | 1.09                       | 0.008   | -1.14                  | 0.001   |
| Sqle                            | BC042781          | Squalene epoxidase                                             | 0.49                   | 0.014   | nc                         | nc      | -1.11                  | 0.014   |
| Dhcr24                          | BC019797          | 24-dehydrocholesterol reductase                                | nc                     | nc      | 0.54                       | 0.018   | -0.57                  | 0.019   |
| Dhcr7                           | BC006854          | 7-dehydrocholesterol reductase                                 | nc                     | nc      | nc                         | nc      | -0.36                  | 0.049   |
| Idi1                            | NM_177960         | Isopentenyl-diphosphate delta isomerase                        | nc                     | nc      | nc                         | nc      | 0.39                   | 0.003   |
| Sc5d                            | BC024132          | Sterol-C5-desaturase homolog                                   | 0.36                   | 0.029   | nc                         | nc      | nc                     | nc      |
| <b>SREBP signaling pathway</b>  |                   |                                                                |                        |         |                            |         |                        |         |
| Insig1                          | NM_153526         | Insulin induced gene 1                                         | 0.82                   | 0.000   | nc                         | nc      | nc                     | nc      |
| Mbtps1                          | NM_019709         | Membrane-bound transcription factor peptidase, site 1          | 1.72                   | 0.000   | 2.06                       | 0.003   | nc                     | nc      |
| Insig2                          | BC023874          | Insulin induced gene 2                                         | 1.94                   | 0.000   | 1.24                       | 0.000   | 0.25                   | 0.038   |
| <b>Bile acid synthesis</b>      |                   |                                                                |                        |         |                            |         |                        |         |
| Cyp8b1                          | NM_010012         | Cytochrome P450, family 8, subfamily b, polypeptide 1          | -2.16                  | 0.000   | -0.67                      | 0.036   | nc                     | nc      |
| Cyp7b1                          | BC038810          | Cytochrome P450, family 7, subfamily b, polypeptide 1          | 0.21                   | 0.014   | nc                         | nc      | nc                     | nc      |
| Cyp27a1                         | NM_024264         | Cytochrome P450, family 27, subfamily a, polypeptide 1         | 0.73                   | 0.000   | 0.46                       | 0.028   | nc                     | nc      |
| Cyp39a1                         | AF237981          | Cytochrome P450, family 39, subfamily a, polypeptide 1         | 1.06                   | 0.000   | 0.91                       | 0.000   | nc                     | nc      |

| <b>Lipid transport</b>   |           |                                                                     |       |       |       |       |       |       |
|--------------------------|-----------|---------------------------------------------------------------------|-------|-------|-------|-------|-------|-------|
| Apoa5                    | BC011198  | Apolipoprotein A-V                                                  | -0.57 | 0.013 | -0.45 | 0.039 | nc    | nc    |
| ApoE                     | BC028816  | Apolipoprotein E                                                    | -0.38 | 0.019 | -0.46 | 0.022 | nc    | nc    |
| Ldlr                     | BC019207  | Low density lipoprotein receptor                                    | 0.32  | 0.017 | 0.42  | 0.039 | -0.38 | 0.037 |
| Apoa4                    | BC010769  | Apolipoprotein A-IV                                                 | 2.23  | 0.000 | 1.00  | 0.001 | 1.09  | 0.000 |
| Apoc3                    | BC021776  | Apolipoprotein C-III                                                | nc    | nc    | nc    | nc    | 0.43  | 0.006 |
| Apoc1                    | BC094638  | Apolipoprotein C-I                                                  | nc    | nc    | nc    | nc    | 0.28  | 0.039 |
| <b>Steroid synthesis</b> |           |                                                                     |       |       |       |       |       |       |
| Cyp21a1                  | NM_009995 | Cytochrome P450, family 21, subfamily a, polypeptide 1              | 0.56  | 0.000 | 0.57  | 0.013 | nc    | nc    |
| Cyp17a1                  | NM_007809 | Cytochrome P450, family 17, subfamily a, polypeptide 1              | 1.62  | 0.000 | 1.03  | 0.000 | nc    | nc    |
| <b>Transporters</b>      |           |                                                                     |       |       |       |       |       |       |
| Abcc1                    | NM_008576 | ATP-binding cassette, sub-family C (CFTR/MRP), member 1             | -0.50 | 0.016 | nc    | nc    | nc    | nc    |
| Abcb4                    | NM_008830 | ATP-binding cassette, sub-family B (MDR/TAP), member 4              | -0.46 | 0.001 | nc    | nc    | nc    | nc    |
| Slc2a4                   | BC014282  | Solute carrier family 2 (facilitated glucose transporter), member 4 | -0.43 | 0.000 | nc    | nc    | nc    | nc    |
| Slco2b1                  | BC096485  | Solute carrier organic anion transporter family, member 2b1         | -0.40 | 0.001 | nc    | nc    | 0.25  | 0.009 |
| Abca1                    | NM_013454 | ATP-binding cassette, sub-family A (ABC1), member 1                 | -0.39 | 0.024 | -0.38 | 0.015 | 0.18  | 0.040 |
| Slc2a1                   | BC055340  | Solute carrier family 2 (facilitated glucose transporter), member 1 | 0.37  | 0.001 | 0.32  | 0.011 | nc    | nc    |
| Abcb1a                   | NM_011076 | ATP-binding cassette, sub-family B (MDR/TAP), member 1A             | 0.41  | 0.000 | 0.31  | 0.024 | nc    | nc    |
| Abcb11                   | NM_021022 | ATP-binding cassette, sub-family B (MDR/TAP), member 11             | 0.46  | 0.001 | nc    | nc    | 0.68  | 0.000 |
| Abcc2                    | NM_013806 | ATP-binding cassette, sub-family C (CFTR/MRP), member 2             | 0.92  | 0.000 | 0.89  | 0.000 | nc    | nc    |
| Slco1a4                  | NM_030687 | Solute carrier organic anion transporter family, member 1a4         | 1.04  | 0.000 | 1.66  | 0.000 | -0.98 | 0.000 |
| Abcc3                    | NM_029600 | ATP-binding cassette, sub-family C (CFTR/MRP), member 3             | 1.29  | 0.000 | 2.06  | 0.000 | -0.76 | 0.003 |
| Abcg8                    | NM_026180 | ATP-binding cassette, sub-family G (WHITE), member 8                | nc    | nc    | -1.02 | 0.006 | nc    | nc    |
| Abcg5                    | NM_031884 | ATP-binding cassette, sub-family G (WHITE), member 5                | nc    | nc    | -0.87 | 0.008 | nc    | nc    |
| Slc10a2                  | NM_011388 | Solute carrier family 10, member 2                                  | nc    | nc    | 0.62  | 0.039 | nc    | nc    |
| <b>Drug metabolism</b>   |           |                                                                     |       |       |       |       |       |       |
| Cyp2e1                   | NM_021282 | Cytochrome P450, family 2, subfamily e, polypeptide 1               | -0.67 | 0.000 | nc    | nc    | nc    | nc    |
| Cyp2c40                  | NM_010004 | Cytochrome P450, family 2, subfamily c, polypeptide 40              | -0.35 | 0.015 | -0.71 | 0.003 | 0.91  | 0.000 |
| Cyp2a12                  | NM_133657 | Cytochrome P450, family 2, subfamily a, polypeptide 12              | 0.83  | 0.000 | 0.66  | 0.000 | nc    | nc    |
| Cyp3a13                  | NM_007819 | Cytochrome P450, family 3, subfamily a, polypeptide 13              | 1.34  | 0.000 | 1.83  | 0.000 | -0.58 | 0.007 |
| Cyp3a25                  | BC028855  | Cytochrome P450, family 3, subfamily a, polypeptide 25              | 1.53  | 0.000 | 1.80  | 0.000 | -0.64 | 0.001 |
| Cyp2a4                   | BC011233  | Cytochrome P450, family 2, subfamily a, polypeptide 4               | 1.86  | 0.000 | 1.62  | 0.000 | -0.41 | 0.010 |
| Cyp1a2                   | NM_009993 | Cytochrome P450, family 1, subfamily a, polypeptide 2               | 1.90  | 0.000 | 1.81  | 0.000 | nc    | nc    |
| Cyp2b9                   | NM_010000 | Cytochrome P450, family 2, subfamily b, polypeptide 9               | 2.30  | 0.000 | 2.41  | 0.000 | nc    | nc    |
| Cyp2b13                  | NM_007813 | Cytochrome P450, family 2, subfamily b, polypeptide 13              | 2.89  | 0.000 | 2.98  | 0.000 | nc    | nc    |
| Cyp2b10                  | AK028103  | Cytochrome P450, family 2, subfamily b, polypeptide 10              | 3.12  | 0.000 | 3.18  | 0.000 | nc    | nc    |
| Cyp2g1                   | NM_013809 | Cytochrome P450, family 2, subfamily g, polypeptide 1               | nc    | nc    | 0.50  | 0.008 | nc    | nc    |

|                                     |           |                                                                   |       |       |       |       |       |       |
|-------------------------------------|-----------|-------------------------------------------------------------------|-------|-------|-------|-------|-------|-------|
| Cyp2f2                              | NM_007817 | Cytochrome P450, family 2, subfamily f, polypeptide 2             | nc    | nc    | nc    | nc    | 0.48  | 0.007 |
| <b>Other</b>                        |           |                                                                   |       |       |       |       |       |       |
| Scarb1                              | NM_016741 | Scavenger receptor class B, member 1                              | -0.87 | 0.000 | -0.88 | 0.000 | 0.31  | 0.003 |
| Orm1                                | BC012725  | Orosomuroid 1                                                     | -0.79 | 0.013 | nc    | nc    | nc    | nc    |
| Acat2                               | NM_009338 | Acetyl-Coenzyme A acetyltransferase 2                             | -0.31 | 0.010 | -0.33 | 0.019 | nc    | nc    |
| Gfpt2                               | BC031928  | Glutamine fructose-6-phosphate transaminase 2                     | -0.29 | 0.006 | nc    | nc    | nc    | nc    |
| Cyp4b1                              | NM_007823 | Cytochrome P450, family 4, subfamily b, polypeptide 1             | 0.25  | 0.042 | nc    | nc    | nc    | nc    |
| Uap1                                | BC016406  | UDP-N-acetylglucosamine pyrophosphorylase 1                       | 0.42  | 0.008 | 0.34  | 0.039 | nc    | nc    |
| Cyp26a1                             | NM_007811 | Cytochrome P450, family 26, subfamily a, polypeptide 1            | 1.98  | 0.000 | 1.77  | 0.000 | nc    | nc    |
| Scp2                                | BC018384  | Sterol carrier protein 2, liver                                   | nc    | nc    | nc    | nc    | 0.34  | 0.005 |
| Icam1                               | BC008626  | Intercellular adhesion molecule                                   | nc    | nc    | nc    | nc    | -0.33 | 0.031 |
| <b>Nuclear receptor superfamily</b> |           |                                                                   |       |       |       |       |       |       |
| Ppara                               | NM_011144 | Peroxisome proliferator activated receptor alpha                  | -0.84 | 0.000 | -0.93 | 0.000 | 0.53  | 0.035 |
| Pparg                               | NM_011146 | Peroxisome proliferator activated receptor gamma                  | -0.83 | 0.005 | nc    | nc    | nc    | nc    |
| Nr1i3                               | NM_009803 | Nuclear receptor subfamily 1, group I, member 3                   | -0.79 | 0.000 | nc    | nc    | -0.54 | 0.018 |
| Nr2f6                               | NM_010150 | Nuclear receptor subfamily 2, group F, member 6                   | -0.47 | 0.007 | -0.32 | 0.031 | nc    | nc    |
| Nr1i2                               | NM_010936 | Nuclear receptor subfamily 1, group I, member 2                   | 0.29  | 0.011 | 0.47  | 0.015 | nc    | nc    |
| Nr5a2                               | NM_030676 | Nuclear receptor subfamily 5, group A, member 2                   | 0.34  | 0.002 | nc    | nc    | 0.46  | 0.001 |
| Nr1d2                               | NM_011584 | Nuclear receptor subfamily 1, group D, member 2                   | 0.70  | 0.000 | 1.10  | 0.003 | nc    | nc    |
| Nr2f2                               | NM_009697 | Nuclear receptor subfamily 2, group F, member 2                   | nc    | nc    | nc    | nc    | 0.38  | 0.005 |
| <b>Transcription regulators</b>     |           |                                                                   |       |       |       |       |       |       |
| Cebpa                               | BC028890  | CCAAT/enhancer binding protein (C/EBP), alpha                     | -1.17 | 0.000 | -0.99 | 0.000 | nc    | nc    |
| Sirt1                               | NM_019812 | Sirtuin 1, silent mating type information regulation 2, homolog 1 | -0.40 | 0.010 | nc    | nc    | nc    | nc    |
| Sp1                                 | AF062566  | Trans-acting transcription factor 1, Specificity protein 1        | -0.35 | 0.002 | nc    | nc    | nc    | nc    |
| Pcaf                                | BC082581  | P300/CBP-associated factor                                        | -0.32 | 0.001 | nc    | nc    | nc    | nc    |
| Foxa2                               | NM_010446 | Forkhead box A2                                                   | -0.22 | 0.049 | nc    | nc    | nc    | nc    |
| Mlxipl                              | NM_021455 | MLX interacting protein-like, old Wbscr14 or Chrebp               | 0.94  | 0.000 | 0.32  | 0.047 | 1.05  | 0.000 |
| Crem                                | M60285    | CAMP responsive element modulator                                 | nc    | nc    | -0.35 | 0.016 | 0.35  | 0.002 |
| Foxo1                               | NM_019739 | Forkhead box O1                                                   | nc    | nc    | nc    | nc    | 0.33  | 0.004 |
| Cebpg                               | BC011319  | CCAAT/enhancer binding protein (C/EBP), gamma                     | nc    | nc    | nc    | nc    | 0.27  | 0.023 |
| Cebpz                               | NM_009882 | CCAAT/Enhancer Binding Protein Zeta                               | nc    | nc    | nc    | nc    | 0.31  | 0.032 |
| <b>Carbohydrate metabolism</b>      |           |                                                                   |       |       |       |       |       |       |
| Pck1                                | BC037629  | Phosphoenolpyruvate carboxykinase 1, cytosolic                    | -0.47 | 0.042 | -0.39 | 0.039 | nc    | nc    |
| Pdhb                                | NM_024221 | Pyruvate dehydrogenase (lipoamide) beta                           | 0.61  | 0.000 | 0.43  | 0.014 | 0.33  | 0.005 |
| G6Pase                              | NM_008061 | Glucose-6-phosphatase catalytic                                   | nc    | nc    | -1.26 | 0.000 | 1.00  | 0.005 |
| <b>Fatty acid metabolism</b>        |           |                                                                   |       |       |       |       |       |       |
| Cpt1a                               | BC038395  | Carnitine palmitoyltransferase 1a, liver                          | -0.81 | 0.000 | -0.38 | 0.004 | nc    | nc    |

|                             |           |                                                                                                                          |       |       |       |       |       |       |
|-----------------------------|-----------|--------------------------------------------------------------------------------------------------------------------------|-------|-------|-------|-------|-------|-------|
| Hmgcl                       | BC025440  | 3-hydroxy-3-methylglutaryl-Coenzyme A lyase                                                                              | 0.31  | 0.008 | 0.64  | 0.003 | -0.53 | 0.001 |
| Lip1                        | NM_021460 | Lysosomal acid lipase 1                                                                                                  | 0.49  | 0.000 | 0.28  | 0.043 | 0.38  | 0.002 |
| Fasn                        | BC046513  | Fatty acid synthase                                                                                                      | 0.58  | 0.007 | nc    | nc    | nc    | nc    |
| Scd1                        | BC007474  | Stearoyl-Coenzyme A desaturase 1                                                                                         | nc    | nc    | -1.32 | 0.018 | 1.40  | 0.004 |
| Cyp4f14                     | NM_022434 | Cytochrome P450, family 4, subfamily f, polypeptide 14                                                                   | nc    | nc    | -0.72 | 0.000 | 0.98  | 0.000 |
| Pla2g6                      | BC003487  | Phospholipase A2, group VI                                                                                               | nc    | nc    | 0.92  | 0.020 | nc    | nc    |
| <b>Cell signaling</b>       |           |                                                                                                                          |       |       |       |       |       |       |
| Ppp1r3c                     | NM_016854 | Protein phosphatase 1, regulatory (inhibitor) subunit 3C                                                                 | -3.47 | 0.000 | -2.64 | 0.000 | -0.39 | 0.015 |
| Igf1                        | NM_010512 | Insulin-like growth factor 1                                                                                             | -1.08 | 0.000 | -1.37 | 0.000 | 0.69  | 0.000 |
| Adipor2                     | NM_197985 | Adiponectin receptor 2                                                                                                   | -0.85 | 0.000 | -0.80 | 0.001 | nc    | nc    |
| Serping1                    | BC002026  | Serine (or cysteine) peptidase inhibitor, clade G, member 1                                                              | -0.65 | 0.005 | -0.47 | 0.009 | nc    | nc    |
| Ogt                         | BC057319  | O-linked N-acetylglucosamine (GlcNAc) transferase (UDP-N-acetylglucosamine:polypeptide-N-acetylglucosaminyl transferase) | -0.51 | 0.000 | nc    | nc    | nc    | nc    |
| Stat3                       | BC003806  | Signal transducer and activator of transcription 3                                                                       | -0.46 | 0.013 | nc    | nc    | -0.35 | 0.028 |
| Camk1d                      | NM_177343 | Calcium/calmodulin-dependent protein kinase ID                                                                           | -0.32 | 0.037 | -0.32 | 0.018 | nc    | nc    |
| Nfkbia                      | BC046754  | Nuclear factor of kappa light chain gene enhancer in B-cells inhibitor, alpha                                            | -0.29 | 0.041 | nc    | nc    | nc    | nc    |
| Mapk9                       | BC028341  | Mitogen activated protein kinase 9                                                                                       | -0.21 | 0.029 | nc    | nc    | -0.17 | 0.030 |
| Adipor1                     | NM_028320 | Adiponectin receptor 1                                                                                                   | 0.19  | 0.021 | nc    | nc    | nc    | nc    |
| Sumo2                       | BC017522  | SMT3 suppressor of mif two 3 homolog 2 (yeast)                                                                           | 0.32  | 0.005 | nc    | nc    | nc    | nc    |
| Mapk8                       | BC053027  | Mitogen activated protein kinase 8                                                                                       | nc    | nc    | 0.40  | 0.016 | nc    | nc    |
| Gckr                        | NM_144909 | Glucokinase regulatory protein                                                                                           | nc    | nc    | nc    | nc    | 0.34  | 0.023 |
| <b>Heme metabolism</b>      |           |                                                                                                                          |       |       |       |       |       |       |
| Hpxn                        | BC019901  | Hemopexin                                                                                                                | -0.52 | 0.039 | -0.40 | 0.015 | nc    | nc    |
| Alas1                       | NM_020559 | Aminolevulinic acid synthase 1                                                                                           | 1.81  | 0.000 | 2.00  | 0.000 | nc    | nc    |
| <b>Housekeeping genes</b>   |           |                                                                                                                          |       |       |       |       |       |       |
| Ppia                        | NM_008907 | Peptidylprolyl isomerase A                                                                                               | 0.39  | 0.004 | 0.29  | 0.043 | nc    | nc    |
| Actb                        | NM_007393 | Actin, beta, cytoplasmic                                                                                                 | 0.67  | 0.010 | nc    | nc    | 0.75  | 0.008 |
| Gapdh                       | NM_008084 | Glyceraldehyde-3-phosphate dehydrogenase                                                                                 | nc    | nc    | nc    | nc    | 0.49  | 0.016 |
| <b>Circadian regulation</b> |           |                                                                                                                          |       |       |       |       |       |       |
| Cry1                        | NM_007771 | Cryptochrome 1 (photolyase-like)                                                                                         | -0.63 | 0.000 | -0.72 | 0.000 | 0.24  | 0.042 |
| Arntl                       | BC011080  | Aryl hydrocarbon receptor nuclear translocator-like                                                                      | -0.36 | 0.003 | -0.26 | 0.038 | nc    | nc    |
| Clock                       | AF000998  | Circadian locomoter output cycles kaput                                                                                  | 0.22  | 0.009 | nc    | nc    | nc    | nc    |
| <b>Serum proteins</b>       |           |                                                                                                                          |       |       |       |       |       |       |
| Saa2                        | BC024606  | Serum amyloid A 2                                                                                                        | -3.60 | 0.000 | -3.28 | 0.001 | nc    | nc    |
| Saa1                        | BC087933  | Serum amyloid A 1                                                                                                        | -3.52 | 0.000 | -3.22 | 0.001 | nc    | nc    |
| Saa3                        | BC055885  | Serum amyloid A 3                                                                                                        | -3.39 | 0.000 | -2.87 | 0.001 | nc    | nc    |
| C4bp                        | NM_007576 | Complement component 4 binding protein                                                                                   | -1.09 | 0.000 | -0.69 | 0.001 | nc    | nc    |
| C9                          | BC011137  | Complement component 9                                                                                                   | -0.88 | 0.000 | -1.15 | 0.000 | 1.13  | 0.000 |
| C4b                         | BC067409  | Complement component 4B (Childo blood group)                                                                             | -0.70 | 0.000 | -0.51 | 0.001 | nc    | nc    |
| Fgb                         | NM_181849 | Fibrinogen, B beta polypeptide                                                                                           | -0.67 | 0.019 | -0.28 | 0.036 | -0.58 | 0.007 |
| C2                          | BC011086  | Complement component 2 (within H-2S)                                                                                     | -0.53 | 0.008 | -0.39 | 0.017 | nc    | nc    |

|      |           |                                       |       |       |      |       |       |       |
|------|-----------|---------------------------------------|-------|-------|------|-------|-------|-------|
| Hc   | M35525    | Hemolytic complement                  | -0.49 | 0.002 | nc   | nc    | nc    | nc    |
| Saa4 | BC019212  | Serum amyloid A 4                     | -0.24 | 0.027 | nc   | nc    | nc    | nc    |
| Crp  | NM_007768 | C-reactive protein, pentraxin-related | 0.25  | 0.044 | 0.31 | 0.036 | nc    | nc    |
| Apcs | BC061125  | Serum amyloid P-component             | nc    | nc    | 0.71 | 0.003 | -0.86 | 0.002 |
