# Supplementary material for: Effect of CAR activation on selected metabolic pathways in normal and hyperlipidemic mouse livers
Source: PubMed Central journal article supplement (PMC2739862; doi:10.1186/1471-2164-10-384), 2009-08-19

## **Systemic effects of TCPOBOP on liver metabolism**

Systemic effects of TCPOBOP on liver metabolism. A. Effects of TCPOBOP in conditions of normal diet. B. Effects of 1 week 1% cholesterol diet. C. Effects of TCPOBOP in conditions of high-cholesterol diet. Bold genes, metabolites or processes are up-regulated.

A

**TCPOBOP / normal diet**

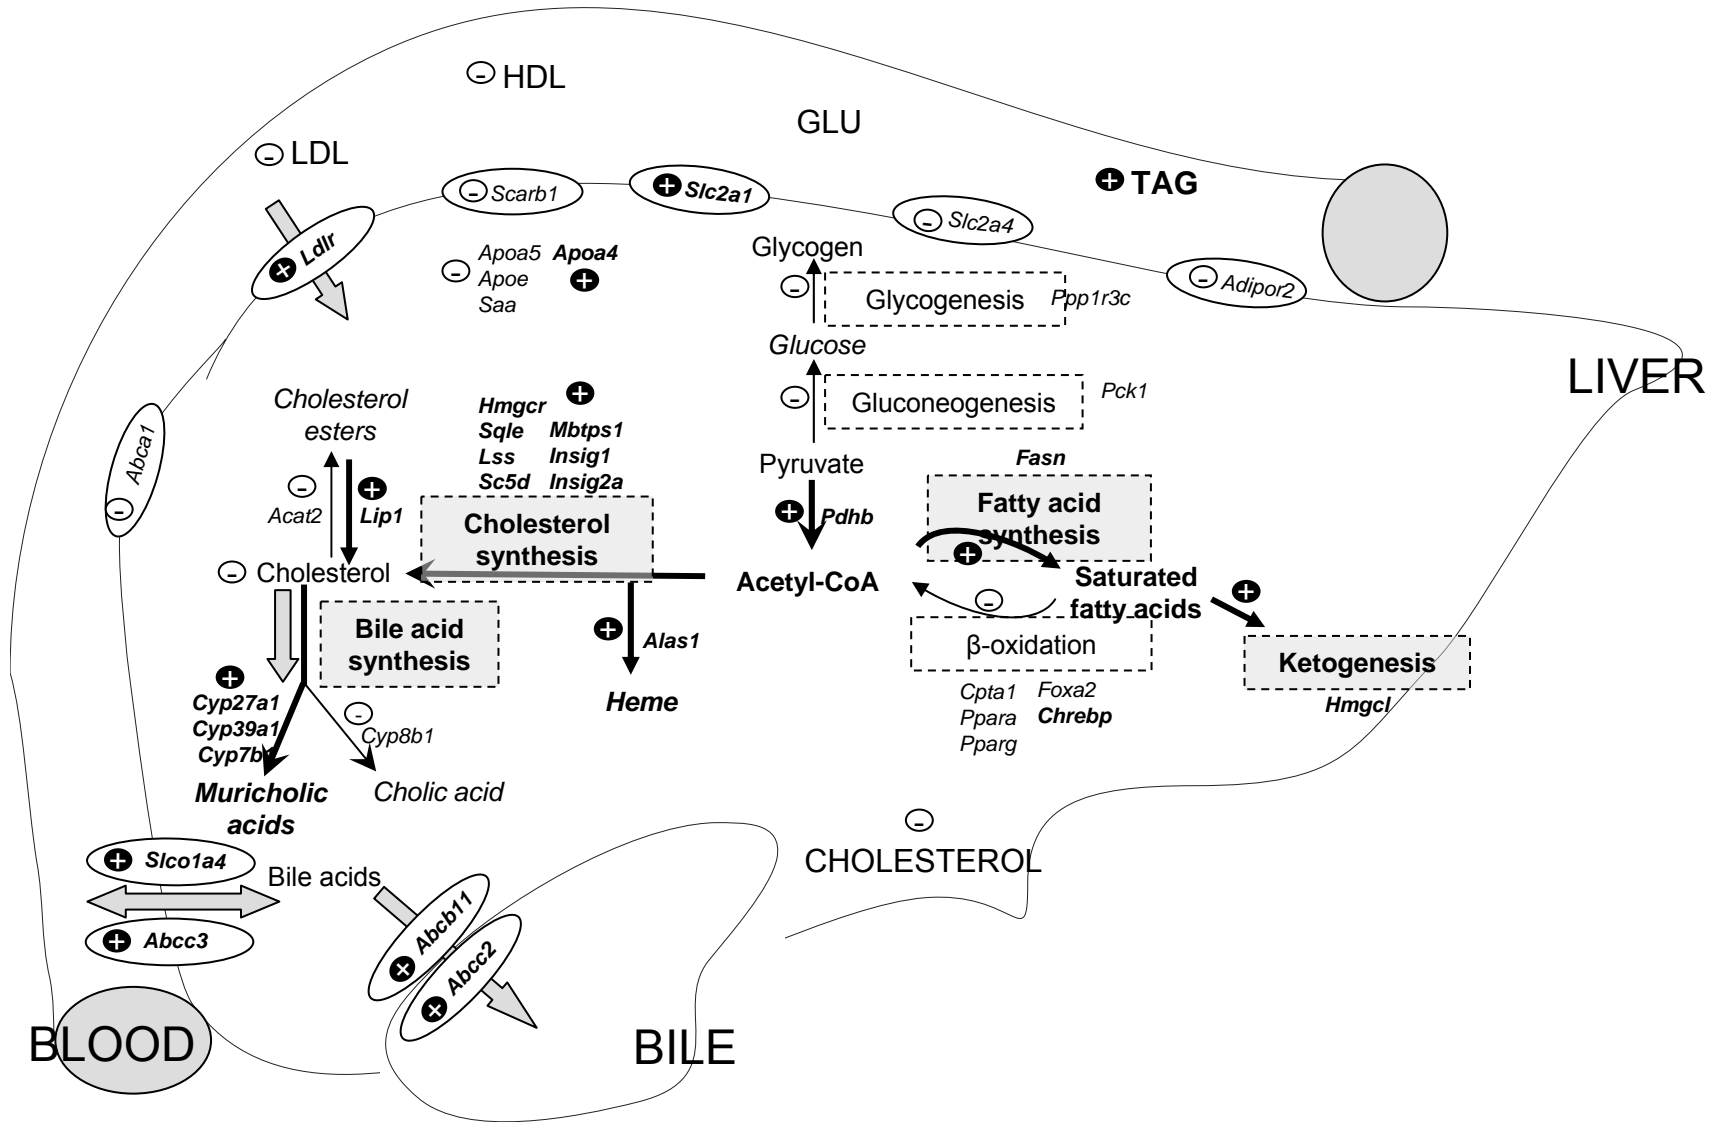

B

High fat diet / normal diet

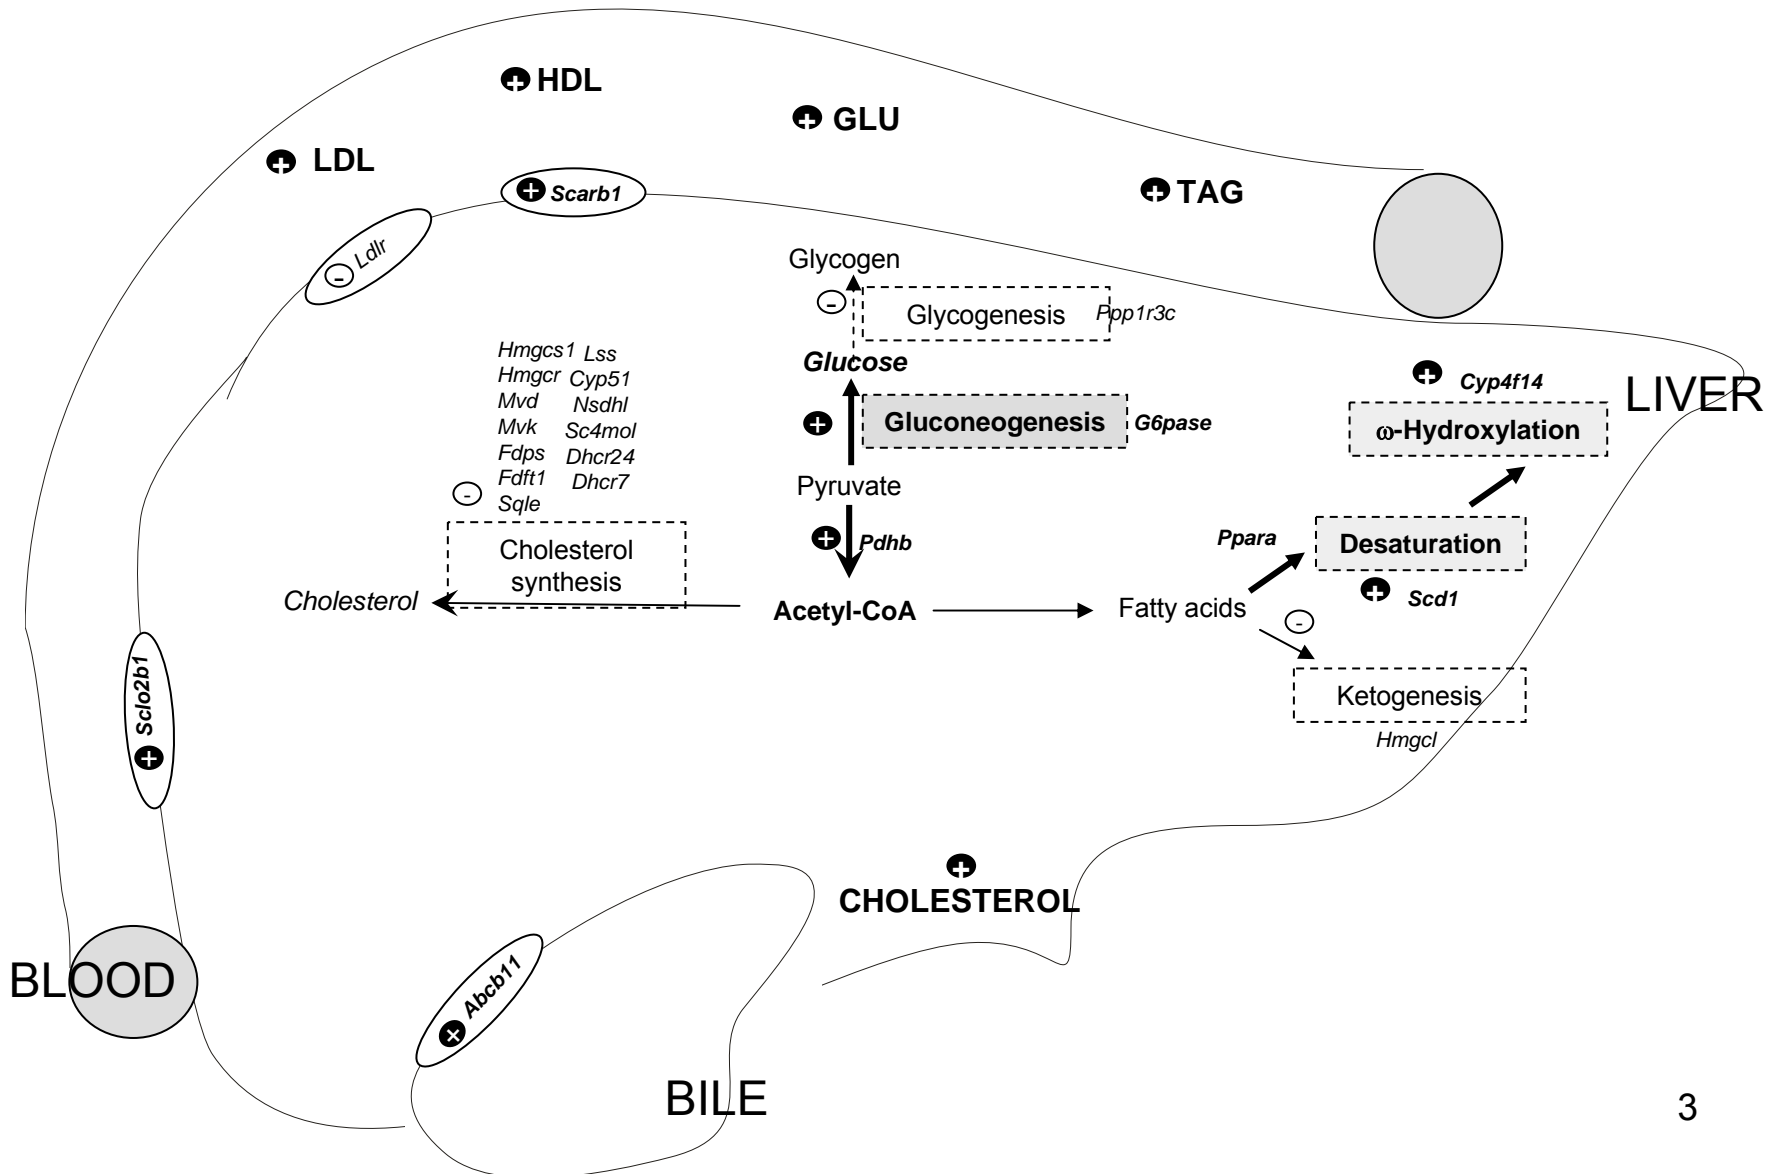

C

TCPOBOP / high fat diet

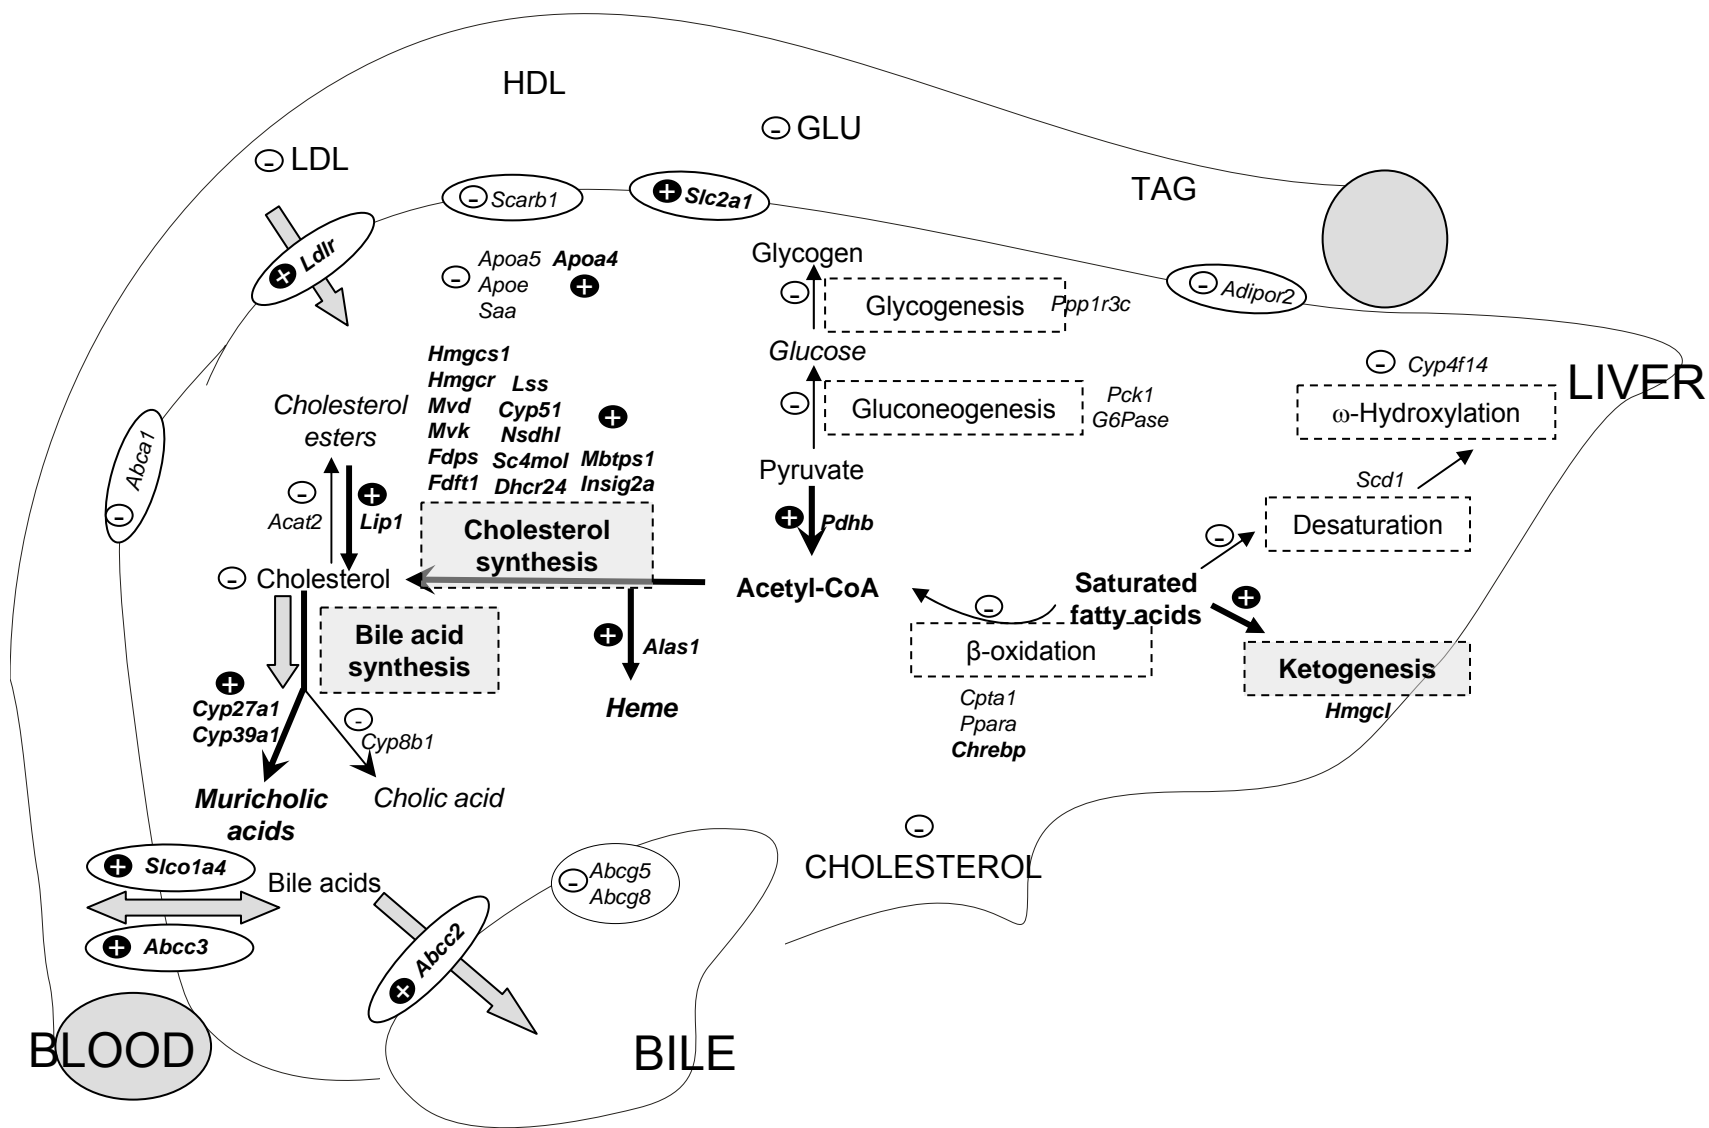

Supplement: 1471-2164-10-384-S2.pdf [file 1471-2164-10-384-S2.pdf]
